# Supplementary material for: Identification and Therapeutic Targeting of GPR20, Selectively Expressed in Gastrointestinal Stromal Tumors, with DS-6157a, a First-in-Class Antibody–Drug Conjugate
Source: Oxford University Press journal article supplement (doi:10.1158/2159-8290.cd-20-1434), 2021-02-12
Supplement: 21598290cd201434-sup-252851_2_supp_6900665_q229c8.xlsx [file 21598290cd201434-sup-252851_2_supp_6900665_q229c8.xlsx]

## Sheet: Table S1
Supplementary table S1. Characteristics for GIST patient samples from DFCI (n=139) and GPR20 positive rate (IHC score ≥1)
	Features			Number of		Number of
				cases (%)		GPR20 positive (%)
	Location of obtained sample
	All GIST samples (n=139)			139 (100)		126 (91)
		Stomach		47 (34)		40 (85)
		Small intestine		25 (18)		24 (96)
		Large intestine		6 (4)		6 (100)
		Abdominal cavity		51 (37)		47 (92)
		Others		10 (7)		9 (90)
	Untreated (n=46)			46 (100)		42 (91)
		Stomach		33 (72)		30 (91)
		Small intestine		8 (17)		7 (88)
		Large intestine		2 (4)		2 (100)
		Abdominal cavity		1 (2)		1 (100)
		Others		2 (4)		2 (100)
	TKI-treated (n=93)			93 (100)		84 (90)
		Stomach		14 (15)		10 (71)
		Small intestine		17 (18)		17 (100)
		Large intestine		4 (4)		4 (100)
		Abdominal cavity		50 (54)		46 (92)
		Others		8 (9)		7 (88)
	Primary vs Metastasis
		Primary		53 (38)		47 (89)
		Metastasis		86 (62)		79 (92)
	KIT IHC score
		3+		30 (22)		29 (97)
		2+		50 (36)		49 (98)
		1+		36 (26)		33 (92)
		0		23 (17)		15 (65)
	KIT/PDGFRA genotype (n=124)
		KIT mutated		99 (80)		86 (91)
		Exon 9		23 (19)		23 (100)
		Exon 11		35 (28)		27 (77)
		Exon 13		3 (2)		3 (100)
		Exon 17		2 (2)		2 (100)
		Exon 9+11		1 (1)		1 (100)
		Exon 9+17		7 (6)		7 (100)
		Exon 11+13/14		5 (4)		4 (80)
		Exon 11+17		22 (18)		22 (100)
		Exon 11+13+17+18		1 (1)		0 (0)
		PDGFRA mutated		9 (7)		8 (89)
		KIT/PDGFRA wild		16 (13)		16 (100)
	Treatment line (n=139)
		Treatment Naïve		46 (33)		42 (91)
		P/R after 1st line		21 (15)		19 (90)
		P/R after 2nd line		12 (9)		10 (83)
		P/R after 3rd line		41 (29)		39 (95)
		Neoadjuvant		19 (14)		16 (84)
	Note:
		Data are presented as No. (%).
		P/R, progression or resistance after the indicated treatment line; neoadjuvant, received imatinib in a neoadjuvant setting before surgery.

## Sheet: Table S2
Supplementary table S2. Comparison of strong positive GPR20 expression (IHC score 3+) in different features of GIST derived from DFCI samples
	Features			Total number of specimens		Number of specimens			Fisher's exact test p value
						GPR20 IHC score
						0, 1+, 2+	3+
	Tumor location
		Stomach		47		41	6		<0.0001*
		Small intestine		25		4	21
	Mutation status
	KIT vs PDGFRA
		KIT mutant		99		45	54		0.0054*
		PDGFRA mutant		9		9	0
	KIT vs WT
		KIT mutant		99		42	52		0.4161
		WT		16		5	11
	PDGFRA vs WT
		PDGFRA mutant		9		9	0		0.0030*
		WT		16		5	11
	KIT mutation by exon
	Exon 9 vs Exon 11
		Exon 9		23		1	22		<0.0001*
		Exon 11		35		28	7
	Exon 9 vs Exon 13
		Exon 9		23		1	22		0.6686
		Exon 13		3		1	2
	Exon 9 vs Exon 17
		Exon 9		23		1	22		0.6686
		Exon 17		2		1	1
	Exon 11 vs Exon 13
		Exon 11		35		28	7		0.6686
		Exon 13		3		1	2
	Exon 11 vs Exon 17
		Exon 11		35		28	7		0.7808
		Exon 17		2		1	1
	Exon 13 vs Exon 17
		Exon 13		3		1	2		1
		Exon 17		2		1	1
	Primary KIT exon 11 vs secondary mutation
	Exon 11 vs Exon 11+13/14
		Exon 11		35		28	7		0.0893
		Exon 11+13/14		5		2	3
	Exon 11 vs Exon 17
		Exon 11		35		28	7		0.0084*
		Exon 11+17		22		9	13
	Primary KIT exon 9 vs secondary mutation
	Exon 9 vs Exon 17
		Exon 9		23		1	22		0.1276
		Exon 9+17		7		2	5
	Treatment line
		Treatment Naïve		46		34	12		(vs Treatment naïve)
		P/R after 1st line		21		11	10		0.0986
		P/R after 2nd line		12		6	6		0.1614
		P/R after 3rd line		41		12	29		0.0004*
		Neoadjuvant		19		8	11		0.0672
	Note:
		WT, KIT/PDGFRA wild type
		P/R, progression or resistance after the indicated treatment line; neoadjuvant, received imatinib in a neoadjuvant setting before surgery.
		p values were adjusted by Holm-Bonferroni method. *; statistically significant, p <0.05

## Sheet: Table S3
Supplementary Table S3. GPR20 expression in KIT/PDGFRA wild type GIST
	GIST samples frorm DFCI
	Sample ID	GPR20 IHC score	KIT IHC score	Location of obtained sample	SDHB /SDHA by IHC	Mutation & other information	Diagosis in clinical
	309	2	2	Stomach	n.d. / n.d.	SDHA mutation	CSS: GIST & (under surveillance for PGL/PCC, suspected due to hypertension) & proven SDHX genetic mutation.
	357	1	3	Stomach	n.d. / n.d.	SDHA mutation	Adult Sporadic SDH GIST & proven SDHX genetic mutation (under surveillance for PGL/PCC, then will be CSS).
	257	2	3	Stomach	n.d. / n.d.	SDHC mutation	CSS: GIST & PGL & genetic mutation
	125	3	3	Stomach	Neg / n.d.	SDHA mutation	Adult Sporadic SDH GIST + SDHB lost by IHC + no CT/CSS/NF1 manifestations.
	289	2	2	Stomach	Neg / n.d.	SDHB mutation	CSS: GIST & PGL & proven SDHX genetic mutation
	41	3	3	Small intestine	Neg / n.d.		Carney Triad
	337	3	1	Stomach	Neg / Neg		CSS: GIST & (under surveillance for PGL/PCC) & proven SDHX genetic mutation.
	305	2	2	Stomach	Neg / Neg		Pediatric Sporadic SDH GIST + SDHB lost by IHC + no CT/CSS/NF1 manifestations.
	261	3	2	Stomach	Neg / n.d.
	373	3	3	Abdominal cavity	Neg / Pos		Adult Sporadic SDH GIST most probably ((1)normal germline genetic test for SDHA, B, C and D. 2)normal metanephrin levels. 3)no detected PGL/PCC by imgaing).
	53	3	3	Stomach	Neg / n.d.	NF1 by diagnosis of neurofibromatosis	NF1 history
	301	3	1	Small intestine	n.d. / n.d.	NF1 mutation (exon 30 and 34)	NF1 history
	145	3	0	Small intestine	n.d. / n.d.	SDHB single copy deletion	QUAD-NEG GIST
	329	3	1	Abdominal cavity	n.d. / n.d.	SDHB single copy deletion	QUAD-NEG GIST
	365	3	2	Abdominal cavity	n.d. / n.d.
	377	3	2	Abdominal cavity	n.d. / n.d.
	Neg: negative
	n.d.: not determined
	SDH: succinate dehydrogenase
	SDHx: SDH subunits of SDHA, SDHB, SDHC and SDHD
	CSS: Carney-Stratakis syndrome
	PGL: Paragangliomas
	PCC: Pheochromocytomas
	NF1: neurofibromatosis type 1
	QUAD-NEG: KITWT/PDGFRAWT/SDHWT/BRAFWT

## Sheet: Table S4
Supplementary table S4. Characteristics for GIST patient samples from NCCHE (n=100) and GPR20 positive rate (IHC score ≥1)
	Features			Number of		Number of
				cases		GPR20 positive (%)
	All GIST samples			100		88 (88)
	Sex
		male		51		43 (84)
		female		49		45 (92)
	Location of obtained sample
		Stomach		65		59 (91)
		Small intestine		18		17 (94)
		Large intestine		10		8 (80)
		Abdominal cavity		7		4 (57)
	KIT IHC score
		3+		19		19 (100)
		2+		52		49 (94)
		1+		22		20 (91)
		0		7		0 (0)
	KIT/PDGFRA genotype
		KIT mutated		59		55 (93)
		Exon 9		6		6 (100)
		Exon 11		44		42 (95)
		Exon 13		3		2 (67)
		Exon 17		1		0 (0)
		Others		5		5 (100)
		PDGFRA mutated		11		9 (82)
		KIT/PDGFRA wild		16		12 (75)
		not determined		14		12 (86)
	Note:
		Data are presented as No. (%).
		Abdominal cavity includes peritoneum, abdominal cavity and omentum.
		GPR20 IHC was conducted using rat anti-GPR20 antibody 04-093.

## Sheet: Table S5
Supplementary table S5. Comparison of GPR20 expression (IHC score 3+, 2+ vs IHC score 1+, 0) in different features of GIST
		Samples from National Cancer Center Hospital East (Japan)
	Features			Total number of specimens		Number of specimens			Fisher's exact test p value
						GPR20 IHC score
						0, 1+	2+, 3+
	Tumor location
		stomach		65		43	22		<0.0001*
		small intestine		18		1	17
	Mutation status
	KIT vs PDGFRA
		KIT mutant		59		28	31		0.0496*
		PDGFRA mutant		11		9	2
	KIT vs WT
		KIT mutant		59		28	31		1
		WT		16		8	8
	PDGFRA vs WT
		PDGFRA mutant		11		9	2		0.1241
		WT		16		8	8
	KIT and PDGFRA mutation by exon
	Exon 9
		mutant		6		4	2		0.6741
		wild		64		32	32
	Exon 11
		mutant		46		21	25		0.2823
		wild		38		22	16
	PDGFRA
		D842V		5		4	1		0.3705
		others		95		50	45
	Note:
		GPR20 IHC was conducted using rat anti-GPR20 antibody 04-093. Sensitivity of rat 04-093 Ab is lower than that of rabbit 04-093OcH1L1 Ab
		In comparison of the sensitivity of the detector antibodies using the commercially available GIST tissue microarray, most of GIST samples stained
		with rat 04-093 to GPR20 IHC score 3+ and 2+ corresponded to GPR20 strong positive (IHC score 3+) when stained with rabbit 04-093OcH1L1 (Supplementary Fig. S1A).
		Therefore, GIST patients were divided to GPR20 IHC score3+, 2+ and GPR20 IHC score 1+, 0 groups for comparison analysis of NCCHE GIST samples.
	WT, KIT/PDGFRA wild type
	*; statistically significant, p <0.05

## Sheet: Table S6
Supplementary Table S6. GPR20 expression in normal tissues
	FDA Human multiple organ normal tissue array (US Biomax, Inc., catalogue No. BN1003)
	Organ	GPR20
	Cerebrum	Negative
	Cerebellum	Negative
	Hypophysis	Negative
	Nerve	Negative
	Eye	Negative
	Adrenal gland	Negative
	Thyroid	Negative
	Heart	Negative
	Lung	Negative
	Skin	Negative
	Bone	Negative
	Tongue	Negative
	Esophagus	Negative
	Stomach*	Negative
	Colon*	Negative
	Liver	Negative
	Pancreas	Negative
	Bone marrow	Negative
	Spleen	Negative
	Thymus	Negative
	Tonsil	Negative
	Testis	Negative
	Prostate	Negative
	Breast	Negative
	Endometrium	Negative
	Uterine cervix	Negative
	Ovary	Negative
	Fallopian tube	Negative
	Placenta	Negative
	Kidney	Negative
	Ureter	Negative
	Bladder	Negative
	Skeletal muscle	Negative
	*Gastrointestinal nerve plexus was not included in the cores.
	GPR20 IHC was conducted using rabbit anti-GPR20 mAb 04-093OcH1L1.

## Sheet: Table S7
Supplementary Table S7. GPR20 expression in major malignant tumor tissues
	Multiple organ tumor tissue micro array (US Biomax, Inc., catalogue No. MC2082b)
	Organ/Anatomic Site	Pathology diagnosis	n	GPR20 IHC score, n (%)
				0	1+	2+	3+
	Cerebrum	Astrocytoma	4	4 (100)	0 (0)	0 (0)	0 (0)
		Glioblastoma	4	4 (100)	0 (0)	0 (0)	0 (0)
	Thyroid	Papillary adenocarcinoma	4	4 (100)	0 (0)	0 (0)	0 (0)
		Follicular carcinoma	4	4 (100)	0 (0)	0 (0)	0 (0)
	Lung	Squamous cell carcinoma	4	4 (100)	0 (0)	0 (0)	0 (0)
		Adenocarcinoma	4	4 (100)	0 (0)	0 (0)	0 (0)
		Large cell carcinoma	4	4 (100)	0 (0)	0 (0)	0 (0)
		Small cell carcinoma	4	4 (100)	0 (0)	0 (0)	0 (0)
	Head and Neck	Squamous cell carcinoma	8	8 (100)	0 (0)	0 (0)	0 (0)
	Esophagus	Adenocarcinoma	5	5 (100)	0 (0)	0 (0)	0 (0)
		Squamous cell carcinoma	2	2 (100)	0 (0)	0 (0)	0 (0)
	Stomach	Adenocarcinoma	8	8 (100)	0 (0)	0 (0)	0 (0)
	Colon	Adenocarcinoma	8	8 (100)	0 (0)	0 (0)	0 (0)
	Liver	Hepatocellular carcinoma	8	8 (100)	0 (0)	0 (0)	0 (0)
	Pancreas	Adenocarcinoma	8	8 (100)	0 (0)	0 (0)	0 (0)
	Spleen	Diffuse B-cell lymphoma	8	8 (100)	0 (0)	0 (0)	0 (0)
	Lymph node	Lymphoma	8	8 (100)	0 (0)	0 (0)	0 (0)
	Skin	Squamous cell carcinoma	8	8 (100)	0 (0)	0 (0)	0 (0)
		Dermatofibrosarcoma	4	4 (100)	0 (0)	0 (0)	0 (0)
		Malignant melanoma	6	6 (100)	0 (0)	0 (0)	0 (0)
	Rectum	Malignant melanoma	2	2 (100)	0 (0)	0 (0)	0 (0)
	Soft tissue	Liposarcoma	4	4 (100)	0 (0)	0 (0)	0 (0)
	Breast	Invasive ductal carcinoma	8	8 (100)	0 (0)	0 (0)	0 (0)
		Invasive lobular carcinoma	8	8 (100)	0 (0)	0 (0)	0 (0)
	Ovary	Adenocarcinoma	8	8 (100)	0 (0)	0 (0)	0 (0)
		Disgerminoma	4	4 (100)	0 (0)	0 (0)	0 (0)
		Sertoli-stromal cell tumor	4	4 (100)	0 (0)	0 (0)	0 (0)
	Uterus	Endometrioid adenocarcinoma	8	8 (100)	0 (0)	0 (0)	0 (0)
	Uterine cervix	Squamous cell carcinoma	8	8 (100)	0 (0)	0 (0)	0 (0)
	Prostate	Adenocarcinoma	8	8 (100)	0 (0)	0 (0)	0 (0)
	Testis	Seminoma	8	8 (100)	0 (0)	0 (0)	0 (0)
	Kidney	Clear cell carcinoma	16	16 (100)	0 (0)	0 (0)	0 (0)
	Bladder	Transitional cell carcinoma	8	8 (100)	0 (0)	0 (0)	0 (0)
	GPR20 IHC was conducted using rabbit anti-GPR20 mAb 04-093OcH1L1.

## Sheet: Table S8
Supplementary Table S8. GPR20 expression in sarcomas
	Sarcoma tissue microarray (University of Basel)
	Sarcoma type	Number of cases	GPR20 IHC score, n (%)
			0	1+	2+	3+
	Osteosarcoma	11	11 (100)	0 (0)	0 (0)	0 (0)
	Rhabdomyosarcoma	11	11 (100)	0 (0)	0 (0)	0 (0)
	Leiomyosarcoma	16	15 (94)	1 (6)*	0 (0)	0 (0)
	Liposarcoma	14	14 (100)	0 (0)	0 (0)	0 (0)
	Angiosarcoma	6	6 (100)	0 (0)	0 (0)	0 (0)
	MPNST	16	16 (100)	0 (0)	0 (0)	0 (0)
	Myxofibrosarcoma	8	8 (100)	0 (0)	0 (0)	0 (0)
	GIST	17	0 (0)	0 (0)	4 (24)	13 (76)
	GIST, gastrointestinal stromal tumor; MPNST: malignant peripheral nerve sheath tumor.
	* The leiomyosarcoma sample with GPR20 IHC score 1+ was collected from lung of a female patient with grade 2 leiomyosarcoma in 2002.
	GPR20 IHC was conducted using rabbit anti-GPR20 mAb 04-093OcH1L1.
